# Supplementary material
Source: Copernicus journal article supplement (doi:10.5194/egusphere-2025-5338)
Supplement: Supplementary file 1 [file egusphere-2025-5338-supplement.pdf]

1 *Supplementary of*

2 **Numerical modeling on the mechanisms of chlorine chemistry in snowpack and**  
3 **their impact on secondary atmospheric pollution**

4

5

6 **Shengjin Xie et al.**

7

8 Correspondence to: Xuelei Zhang ([zhangxuelei@iga.ac.cn](mailto:zhangxuelei@iga.ac.cn))

9

10

11 **This supplementary document consists of including 2 text, 6 Figures and 3 Tables.**

12

**Text captions**

13 **Text S1.** N<sub>2</sub>O<sub>5</sub> uptake and ClNO<sub>2</sub> production on snowpack.

14 **Text S2.** Snow parameters observed by satellite remote sensing.

15

16

**Figure captions**

17 **Figure S1.** Characterization of S/V<sub>g</sub> under different LU-LC.

18 **Figure S2.** N<sub>2</sub>O<sub>5</sub> uptake and ClNO<sub>2</sub> yield on the ground surfaces (snow, vegetation,  
19 and buildings).

20 **Figure S3.** Monthly average spatial distribution of snow parameters (snow depth, snow  
21 coverage, snow density, and albedo).

22 **Figure S4.** Spatial distribution of oxidative species (OH, HO<sub>2</sub>, RO<sub>2</sub>) in different  
23 scenarios.

24 **Figure S5.** Spatial distribution of PM<sub>2.5</sub> and its component species in different scenarios.

25 **Figure S6.** The contribution of the photolysis process of ClNO<sub>2</sub> on the ground surface.

26

27

**Table captions**

28 **Table S1.** Model configurations of WRF and CAMx.

29 **Table S2.** Heterogeneous chemical reaction parameter schemes of N<sub>2</sub>O<sub>5</sub> on aerosol  
30 surface.

31 **Table S3.** Comparative analysis of statistical indicators for the simulation results of

32 N<sub>2</sub>O<sub>5</sub> heterogeneous processes on atmospheric aerosol surfaces under different  
33 parameter schemes.

34

35

### Text captions

#### 36 **Text S1. N<sub>2</sub>O<sub>5</sub> uptake and ClNO<sub>2</sub> Production on snowpack:**

37 Previous studies in mid-latitude regions report a snow particle radius ( $r_s$ ) near the  
38 surface ranging from 40 to 500  $\mu\text{m}$ , with snow density between 0.14 and 0.26  $\text{g cm}^{-3}$   
39 (Wang et al., 2020). The Northeast China region exhibits a larger snow particle size  
40 range (370-1550  $\mu\text{m}$ ) and lower snow density (0.07-0.21  $\text{g cm}^{-3}$ ). Compared with the  
41 above data, we sampled a snow particle radius of 600 $\mu\text{m}$  within the existing research  
42 range and used a snow density of 0.20  $\text{g cm}^{-3}$  for study. The calculated snow specific  
43 surface area is 54  $\text{cm}^2 \text{g}^{-1}$ .

44 The pseudo first order loss rate of N<sub>2</sub>O<sub>5</sub> (g) on snow grain is shown in equation  
45 (R1-R2).

$$46 \quad \frac{d[\text{N}_2\text{O}_5]}{dt} = -k_{het}[\text{N}_2\text{O}_5] \quad (\text{R1})$$

$$47 \quad k_{het} = \frac{1}{4} \gamma_{eff, \text{N}_2\text{O}_5} \bar{v} \times SA \quad (\text{R2})$$

$$48 \quad \frac{1}{\gamma_{eff, \text{N}_2\text{O}_5}} = \frac{1}{\Gamma_{diff}} + \frac{1}{\gamma_{\text{N}_2\text{O}_5, snow}} \quad (\text{R3})$$

$$49 \quad \frac{1}{\Gamma_{diff}} = \frac{8D_{SIA}}{\bar{v}(2r)} \quad (\text{R4})$$

50  $k_{het}$  is the pseudo-first-order rate coefficient,  $\gamma_{eff, \text{N}_2\text{O}_5}$  is the effective uptake  
51 coefficient,  $\bar{v}$  ( $\text{cm s}^{-1}$ ) is the thermal speed, and SA is the ratio of ground surface (snow  
52 grain) to volume.  $\gamma_{\text{N}_2\text{O}_5, snow}$  and  $\gamma_{eff, \text{N}_2\text{O}_5}$  are the reactive uptake and the effective  
53 uptake coefficient of N<sub>2</sub>O<sub>5</sub> on snow grains, respectively.  $\Gamma_{diff}$  is a correction term for  
54 normalized gas-diffusion rate.  $r$  is the snow grain radius.

55 The diffusion rate in snow interstitial air (SIA) is controlled by molecular diffusion  
56  $D_{SIA}$  ( $\text{m}^2 \text{s}^{-1}$ ) (Thomas et al., 2011; Toyota et al., 2014; Wang et al., 2020).  $D_g$  is the  
57 diffusion coefficient.  $\lambda_{air}$  is the mean free path.  $\tau$  is the snow tortuosity ( $\tau = 2$ ) (Wang  
58 et al., 2020).

59 
$$D_{SIA} = \frac{D_g}{\tau} \quad (R5)$$

60 
$$D_g = \frac{1}{3} \lambda_{air} \sqrt{8RT/(M\pi)} \quad (R6)$$

61 The liquid brine layer fraction ( $f_{brine}$ ) in a sodium chloride solution is estimated by Eq.  
 62 R7 , reflecting the enrichment of Na and  $Cl^-$  in the snow-brine layer (Cho et al., 2002).  
 63 The  $f_{brine}$ , a highly concentrated salt solution, typically resides within the pores between  
 64 ice crystals and should not be equated with the direct measurement of chloride ion  
 65 concentration in snow meltwater samples.  $[Cl^-](M)$  represents the chloride  
 66 concentration in the snow brine phase, which is estimated by dividing the snow melt  
 67 chloride concentrations by  $f_{brine}$ .  $M_{H_2O}$  is the molecular weight of water, R is the gas  
 68 constant,  $T_f$  is the freezing temperature,  $\Delta H_f^0$  is the enthalpy of fusion, and  $C_T$  is the  
 69 total concentration of ions of the snowmelt sampled on the corresponding day.

70 
$$f_{brine} = \frac{M_{H_2O} R T_f}{1000 \Delta H_f^0} \left( \frac{T}{T - T_f} \right) C_T \quad (R7)$$

71 
$$\frac{1}{\gamma} = \frac{1}{\alpha} + \frac{\bar{v}}{4HRT \sqrt{k^l D_{aq}}} \quad (R8)$$

72  $k^l$  is the pseudo-first-order rate in the brine layer. and  $D_{aq}$  is the aqueous diffusion  
 73 coefficient. The  $ClNO_2$  yield from snow grains ( $Y_{ClNO_2, snow}$ ) were calculated. The  
 74 parameters in  $k^l$  and  $Y_{ClNO_2, snow}$  can be found in (Wang et al., 2020).

75 
$$k^l = k_{H_2O} [H_2O] + k_{Cl^-} [Cl^-] \quad (R9)$$

76 
$$Y_{ClNO_2, snow} = \frac{k_{Cl^-} [Cl^-]}{k_{Cl^-} [Cl^-] + k_{H_2O} [H_2O]} \quad (R10)$$

77 **Text S2. Snow parameters observed by satellite remote sensing.**

78 The snow parameters (depth, snow-cover, density, and albedo) were extracted  
 79 from the ERA5.0 dataset to calculate monthly average spatial distribution maps for  
 80 February 2024 (Fig. S3). In Northeast China, the maximum monthly average snow  
 81 depth reached 0.7 m in southeastern Heilongjiang Province. Snow depth generally  
 82 increased with increasing latitude across the region. Snow coverage exceeded 95% in  
 83 most areas of Heilongjiang Province and parts of southeastern Jilin Province.  
 84 Conversely, snow coverage was relatively low (15-30%) in western Jilin Province and

85 the central and southwestern regions of Liaoning Province. In areas with high snow  
 86 depth and coverage in Heilongjiang Province, maximum snow density reached 254  
 87 kg/m<sup>3</sup>. In other regions, snow density remained relatively constant at approximately  
 88 135 kg/m<sup>3</sup> (Fig. S3c), consistent with the snow density range reported in the (Text S1).  
 89 The reliability of the observed 0.2 g cm<sup>-3</sup> (200 kg/m<sup>3</sup>) snow density was further  
 90 validated using satellite data. Maximum snow albedo values reached approximately  
 91 0.73, exhibiting a correlation with snow depth snow age. This analysis presents the  
 92 spatial distribution of snow parameters based on monthly averages (Figure S3b).  
 93 However, it is crucial to acknowledge potential biases arising from snowmelt events,  
 94 which could result in soil exposure and inaccuracies in the assessment of true snow  
 95 cover conditions. The numerical range of snow variables provided by the ERA5.0  
 96 reanalysis data was utilized to verify the accuracy of snow depth, coverage, and density  
 97 data obtained through field observations and laboratory physical tests in the Text S1.  
 98 This validation step ensured the accuracy and effectiveness of the simulation results  
 99 under regional snow conditions.

100 **Figure captions**

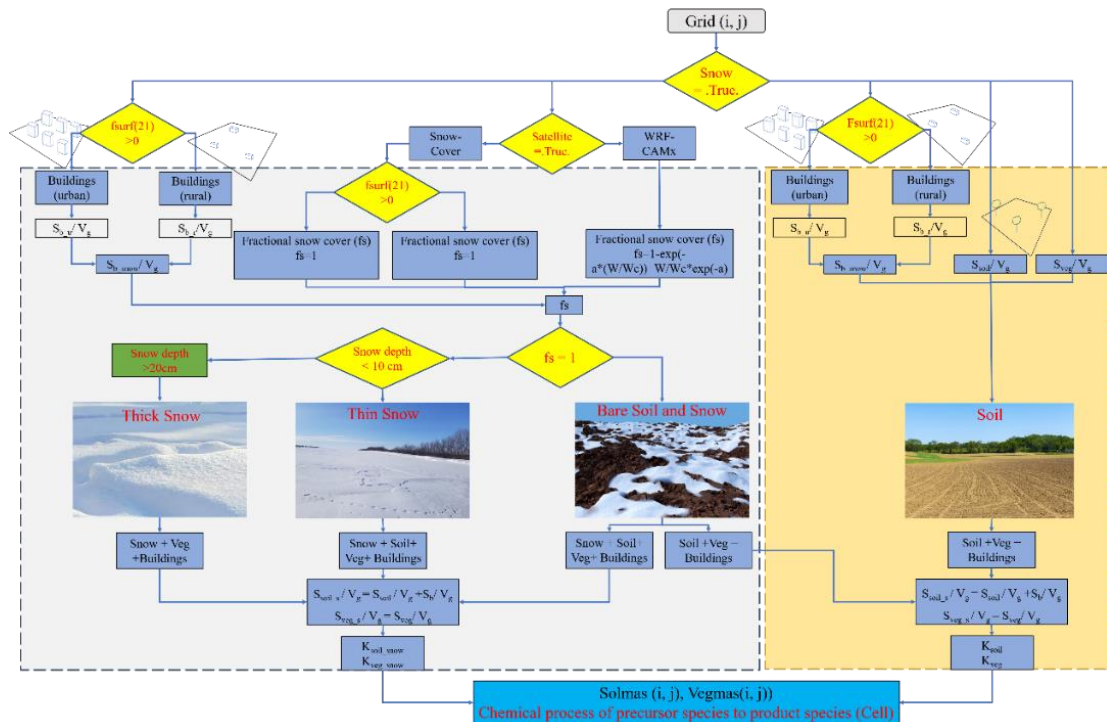

101

102

**Figure S1.** Characterization of  $S/V_g$  under different LU-LC.

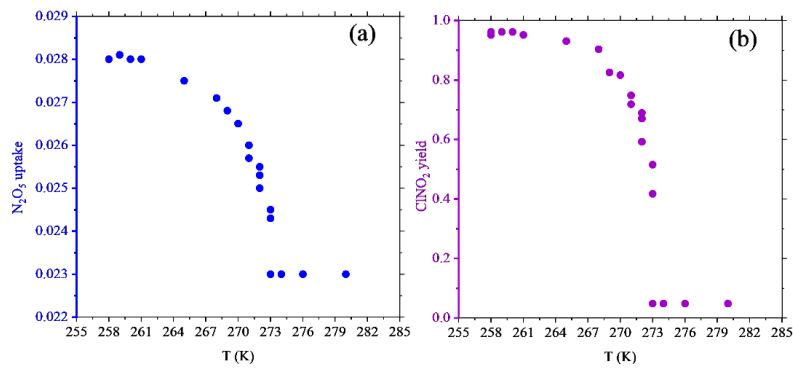

103

104

**Figure S2.**  $N_2O_5$  uptake and  $ClNO_2$  yield on the ground surfaces (snow, vegetation, and buildings).

105

106

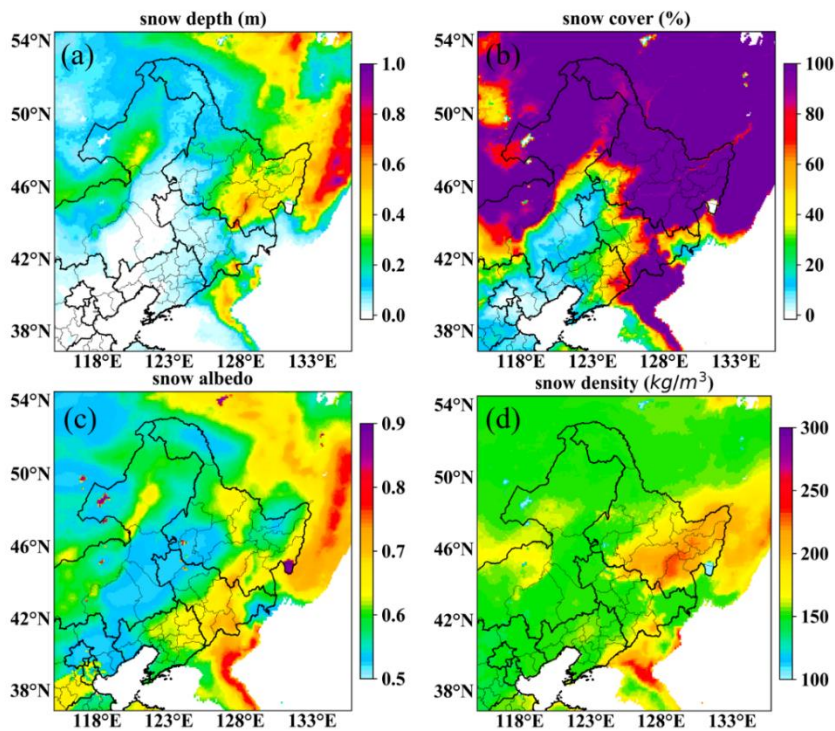

107

108

**Figure S3.** Monthly average spatial distribution of snow parameters (snow depth, snow coverage, snow density, and albedo).

109

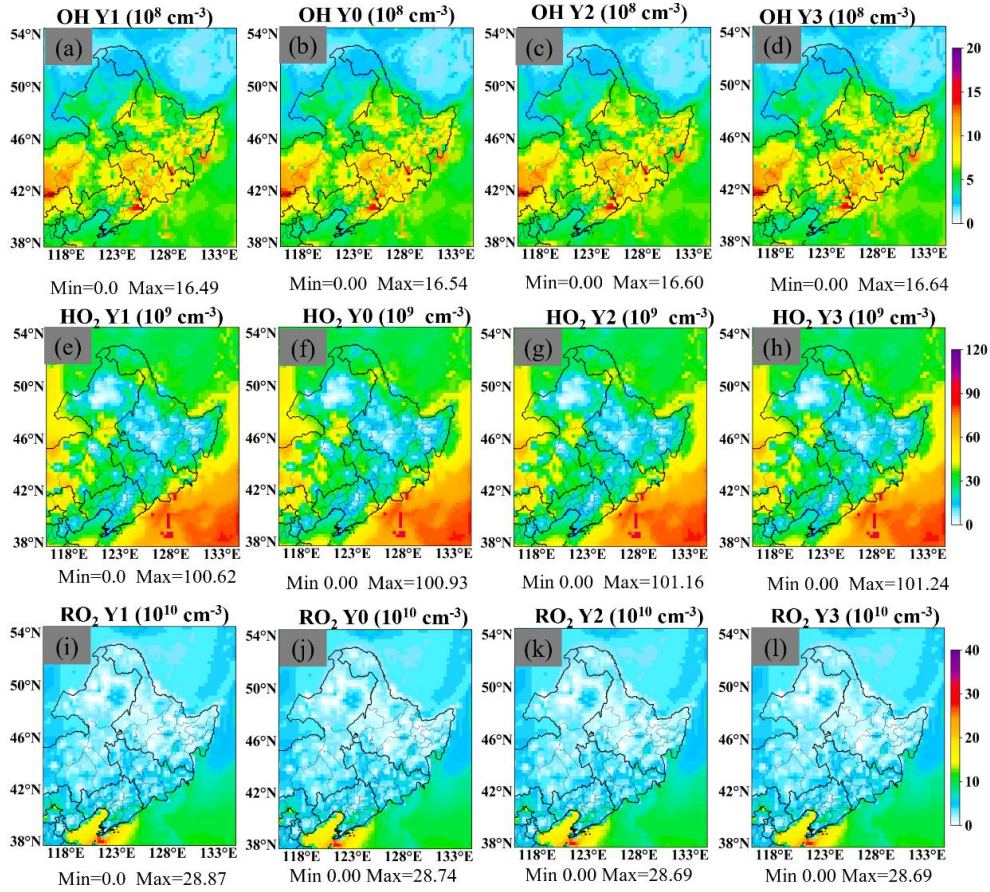

110

111

**Figure S4.** Spatial distribution of oxidative species (OH, HO<sub>2</sub>, and RO<sub>2</sub>) in different scenarios.

112

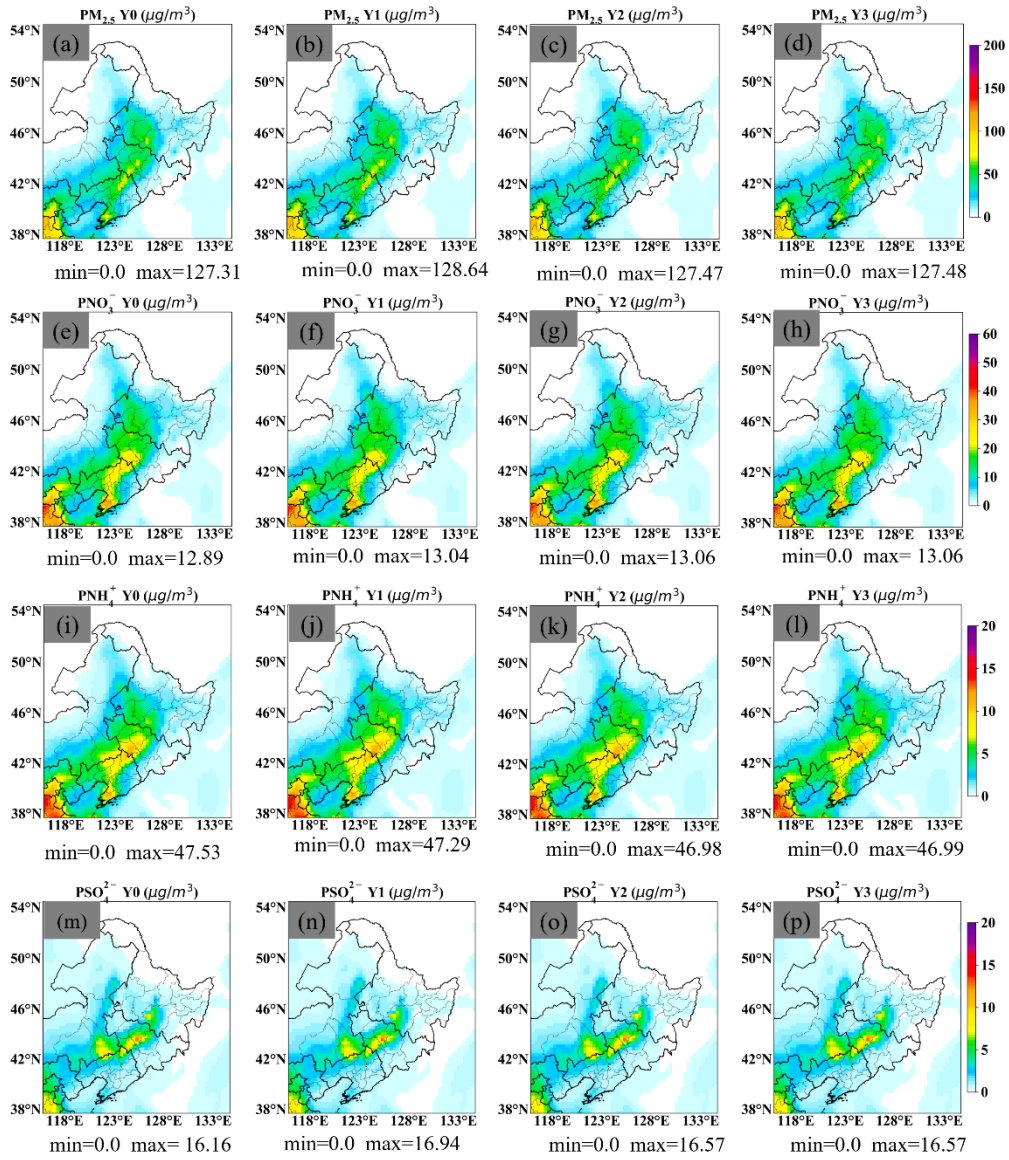

113

114 **Figures S5.** Spatial distribution of  $PM_{2.5}$  and its component species in different  
 115 scenarios.

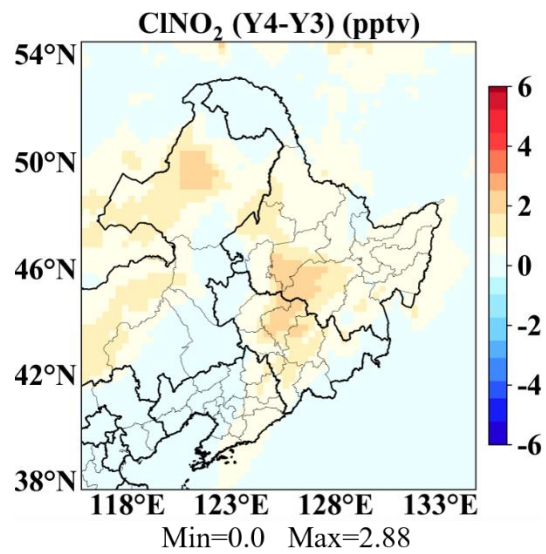

116

117 **Figure S6.** The contribution of the photolysis process of CINO<sub>2</sub> on the ground surface

118

**Table captions**

119

**Table S1.** Model configurations of WRF and CAMx

| WRFv3.9.1 Model Configurations  |                       | CAMxv7.10 Model Configurations       |                                  |
|---------------------------------|-----------------------|--------------------------------------|----------------------------------|
| Physics Treatment               | Scheme                | Model options                        | Scheme                           |
| Microphysics                    | (6) WSM6              | Vertical diffusion                   | ACM2                             |
| Longwave radiation              | (4) RRTMG             | Horizontal diffusion                 | Explicit simultaneous 2-D solver |
| Shortwave radiation             | (4) RRTMG             | Vertical advection                   | PPM                              |
| Land surface model (LSM)        | (2) Noah Land-Surface | Horizontal Advection                 | PPM                              |
| Surface layer                   | (1) Monin-Obukhov     | Chemistry Solver                     | EBI                              |
| Planetary boundary layer scheme | (1) YSU               | Deposition velocity                  | ZHANG03                          |
| Cumulus Parameterization        | (5) Grell 3D          | Gas-phase chemistry / Aerosol module | CB06/ CF                         |

120

**Table S2.** Heterogeneous chemical reaction parameter scheme of N<sub>2</sub>O<sub>5</sub> on aerosol surface

122

| Parameter    | CAMx                              | Yu (2020)                       |
|--------------|-----------------------------------|---------------------------------|
|              | Bertram (2009)                    |                                 |
| Source       | Laboratory simulation             | Field observations (China)      |
| $k'_{2f}$    | $\beta - \beta e^{-\delta[H_2O]}$ | $3.0 \times 10^4 \times [H_2O]$ |
| $k_3/k_{2b}$ | 0.06                              | 0.033                           |
| $k_4/k_{2b}$ | 29                                | 3.4                             |
| $k_4/k_3$    | 483                               | 103                             |

123

**Table S3.** Comparative analysis of statistical indicators for the simulation results of N<sub>2</sub>O<sub>5</sub> heterogeneous processes on atmospheric aerosol surfaces under different parameter schemes

126

| Pollutants                    | Snow | Schemes | MB (pptv) | NMB (%) | RMSE (pptv) | IOA  |
|-------------------------------|------|---------|-----------|---------|-------------|------|
| N <sub>2</sub> O <sub>5</sub> | ✓    | BT09    | 114.64    | 1.92    | 201.39      | 0.49 |
|                               | ✓    | YU20    | 69.66     | 1.16    | 139.03      | 0.61 |
| ClNO <sub>2</sub>             | ✓    | BT09    | -29.28    | -0.28   | 100.66      | 0.81 |
|                               | ✓    | YU20    | -16.08    | -0.16   | 99.80       | 0.84 |

127

128

**References**

130

131 Cho, H., Shepson, P. B., Barrie, L. A., Cowin, J. P., and Zaveri, R.: NMR investigation of the quasi-brine  
 132 layer in ice/brine mixtures, *The Journal of Physical Chemistry B*, 106, 11226-11232,  
 133 <https://doi.org/10.1021/jp020449+>, 2002.

134 Thomas, J. L., Stutz, J., Lefer, B., Huey, L. G., Toyota, K., Dibb, J. E., and von Glasow, R.: Modeling  
 135 chemistry in and above snow at Summit, Greenland - Part 1: Model description and results, *Atmos.*

136 Chem. Phys., 11, 4899-4914, <https://doi.org/10.5194/acp-11-4899-2011>, 2011.

137 Toyota, K., McConnell, J. C., Staebler, R. M., and Dastoor, A. P.: Air – snowpack exchange of bromine,  
138 ozone and mercury in the springtime Arctic simulated by the 1-D model PHANTAS – Part 1: In-snow  
139 bromine activation and its impact on ozone, Atmos. Chem. Phys., 14, 4101-4133,  
140 <https://doi.org/10.5194/acp-14-4101-2014>, 2014.

141 Wang, S., McNamara, S. M., Kolesar, K. R., May, N. W., Fuentes, J. D., Cook, R. D., Gunsch, M. J.,  
142 Mattson, C. N., Hornbrook, R. S., Apel, E. C., and Pratt, K. A.: Urban Snowpack ClNO<sub>2</sub> Production  
143 and Fate: A One-Dimensional Modeling Study, ACS Earth Space Chem., 4, 1140-1148,  
144 10.1021/acsearthspacechem.0c00116, <https://doi.org/10.1021/acsearthspacechem.0c00116>, 2020.
